# Supplementary material for: A Coastal Cline in Sodium Accumulation in Arabidopsis thaliana Is Driven by Natural Variation of the Sodium Transporter AtHKT1;1
Source: PLoS Genet. 2010 Nov 11;6(11):e1001193. doi: 10.1371/journal.pgen.1001193 (PMC2978683; doi:10.1371/journal.pgen.1001193)
Supplement: Dataset S1 — Data set containing accession name, ID, country and origin, lat and long of collection site, leaf Na, SNP at C4_6392276, toSeaSal, toSea, and toSal. (0.09 MB XLS) [file pgen.1001193.s001.xls]

## Sheet: data040610.csv
Line	Unique ID	Country	Lat	Long	Na level	SNP C4_6392276	toSeaSal	toSea	toSal
Ag.0	6897	FRA	45	1.3	390.732	C	148.407	148.407	166.709
Alc.0	6988	ESP	40.31	-3.22	1033.14	C	11.6086	276.297	11.6086
ALL1.2	1	FRA	45.2667	1.48333	793.175	C	159.824	159.824	169.692
ALL1.3	2	FRA	45.2667	1.48333	819.16	C	159.824	159.824	169.692
An.1	6898	BEL	51.2167	4.4	2076.14	C	17.0604	17.0604	293.61
App1.16	5832	SWE	56.3333	15.9667	662.922	C	5.31068	5.31068	484.679
Ba1.2	8256	SWE	56.4	12.9	679.286	C	9.74597	9.74597	314.131
Bay.0	6899	GER	49	11	1055.36	T	376.618	400.228	376.618
Belmonte.4.94	957	ITA	42.1167	12.4833	1219.69	T	33.8534	33.8534	241.762
Bg.2	6709	USA	47.6479	-122.305	776.924	C	n.d.	n.d.	n.d.
Bla.1	8264	ESP	41.6833	2.8	706.805	C	6.80799	6.80799	28.6486
Blh.1	8265	CZE	48	19	809.226	C	11.7933	452.267	11.7933
Bor.1	5837	CZE	49.4013	16.2326	1113.88	C	24.9839	449.12	24.9839
Bor.4	6903	CZE	49.4013	16.2326	1195.79	C	24.9839	449.12	24.9839
Br.0	6904	CZE	49.2	16.6166	1559.45	C	6.18847	442.733	6.18847
Bro1.6	8231	SWE	56.3	16	810.976	C	9.4435	9.4435	485.216
Bu.0	8271	GER	50.5	9.5	1607.14	C	319.342	319.342	334.014
BUI	15	FRA	48.3667	0.933333	2174.84	Not Genotyped	n.d.	n.d.	n.d.
Bur.0	6905	IRL	54.1	-6.2	2958.81	T	14.8401	14.8401	667.159
C24	6906	POR	40.2077	-8.42639	4354.93	T	19.2923	25.649	19.2923
CAM.16	23	FRA	48.2667	-4.58333	1709.01	C	7.63291	7.63291	179.553
CAM.61	66	FRA	48.2667	-4.58333	1553	C	7.63291	7.63291	179.553
Can.0	8274	ESP	29.2144	-13.4811	703.079	C	4.13961	4.13961	979.992
Cen.0	8275	FRA	49	0.5	2496.55	T	46.0605	46.2958	46.0605
CIBC.17	6907	UK	51.4083	-0.6383	781.407	C	67.2217	67.2217	213.065
CLE.6	78	FRA	48.9167	-0.483333	1524.88	Not Genotyped	n.d.	n.d.	n.d.
Col.0	6909	USA	38.3	-92.3	914.232	C	n.d.	n.d.	n.d.
CS28007	7000	GER	50.9167	9.57073	1008.68	C	274.952	274.952	290.774
CS28013	6989	UK	54.8	-2.4333	1516.54	C	39.0407	39.0407	609.162
CS28014	6990	NED	53.448	5.73	789.27	C	10.6413	10.6413	66.9748
CS28017	6996	BEL	51.2167	4.4	451.617	C	17.0604	17.0604	293.61
CS28018	6992	BEL	50.3	5.3	952.868	C	136.461	136.461	352.138
CS28049	6994	FRA	45.9	6.13028	1136.21	C	254.324	254.324	261.083
CS28053	7014	UK	56.5459	-4.79821	973.776	C	23.8354	23.8354	803.306
CS28054	7002	NED	51.3333	6.1	963.218	C	91.3044	91.3044	226.113
CS28063	7011	GER	49.6803	8.6161	781.202	C	344.508	344.508	408.892
CS28064	7008	NED	52	5.675	709.169	C	38.0905	38.0905	172.801
CS28090	7035	CZE	48	19	462.999	C	11.7933	452.267	11.7933
CS28091	7026	UK	54.4	-3.2667	1866.42	C	13.3852	13.3852	587.183
CS28097	7004	SUI	47.5	7.5	581.992	C	356.817	356.817	418.639
CS28099	7031	GER	50.0167	8.6667	474.522	C	323.271	323.271	373.464
CS28108	7056	GER	50.5	9.5	746.118	Not Genotyped	n.d.	n.d.	n.d.
CS28128	7062	GER	50.2981	8.26607	753.117	C	281.699	281.699	336.294
CS28133	7069	SUI	46.0333	7.1167	1643.11	C	218.139	218.139	314.999
CS28135	7071	FRA	48.0717	1.33867	1292.61	C	160.007	160.221	160.007
CS28140	6727	UK	51.4083	-0.6383	964.54	C	67.2217	67.2217	213.065
CS28141	6729	UK	51.4083	-0.6383	779.737	C	67.2217	67.2217	213.065
CS28142	6730	UK	51.4083	-0.6383	774.29	C	67.2217	67.2217	213.065
CS28158	7075	FRA	43.3779	2.54038	1145.67	C	45.0231	62.8058	45.0231
CS28163	7078	POR	40.12	-8.25	967.799	C	32.861	40.6635	32.861
CS28165	7080	POR	40.12	-8.25	729.685	C	32.861	40.6635	32.861
CS28181	6744	USA	40.8585	-73.4675	2927.47	T	n.d.	n.d.	n.d.
CS28193	7092	FRA	49.416	2.823	1580.89	C	118.572	118.572	163.665
CS28200	7094	GER	49.8724	8.65081	929.183	C	332.352	332.352	388.715
CS28201	7460	CZE	Unknown	Unkown	808.559	C	n.d.	n.d.	n.d.
CS28202	7100	GER	50.3055	8.324	1050.1	C	284.598	284.598	336.375
CS28208	7098	FRA	47	5	570.451	C	351.549	391.621	351.549
CS28210	7102	GER	50.7224	8.2372	539.009	C	255.471	255.471	289.788
CS28214	7105	CZE	49.4167	16.2667	713.472	C	26.1101	451.749	26.1101
CS28217	7110	NED	52.0333	5.66667	613.46	C	34.5292	34.5292	169.843
CS28236	7123	GER	50.1721	8.38912	890.833	C	297.031	297.031	351.884
CS28241	7126	FIN	60.1997	24.5682	849.169	C	2.32138	2.32138	1113.94
CS28243	7128	RUS	58.3	25.3	689.393	C	48.0919	48.0919	1084.24
CS28252	7139	GER	50.5	8.0167	626.395	C	254.41	254.41	310.847
CS28268	7135	GER	50.1102	8.6822	752.016	C	317.983	317.983	363.72
CS28274	7141	GER	50.3	8	1025.08	C	266.338	266.338	332.608
CS28277	7145	SUI	46.5	6.08	1273.52	C	306.09	306.09	319.014
CS28279	7143	NED	51.0167	5.86667	715.639	C	101.244	101.244	264.767
CS28280	7147	GER	50.584	8.67825	610.04	C	288.414	288.414	313.167
CS28282	7151	GER	51.5338	9.9355	689.737	C	217.539	217.539	237.112
CS28326	7158	AUT	47	15.5	927.632	C	115.598	196.793	115.598
CS28332	7150	GER	50.3	8	836.583	C	266.338	266.338	332.608
CS28336	7163	GER	52.3721	9.73569	911.802	C	128.986	128.986	151.714
CS28344	7166	NED	51.25	5.9	618.936	C	84.6827	84.6827	239.631
CS28345	7169	GER	54.4175	9.88682	1118.03	C	5.67076	5.67076	57.2206
CS28350	7165	GER	51.3472	8.28844	911.896	C	211.431	211.431	223.926
CS28364	7181	GER	50.927	11.587	784.678	C	334.242	334.242	357.187
CS28369	7424	CZE	49.2	16.6166	329.667	C	6.18847	442.733	6.18847
CS28373	7178	CZE	49	15	2926.6	T	84.7409	375.112	84.7409
CS28382	7188	GER	50.0667	8.5333	811.901	C	312.312	312.312	365.686
CS28394	7199	GER	50.95	6.9666	1177.32	C	165.08	165.08	256.319
CS28395	7186	LTU	54.8969	23.8924	803.333	C	173.615	173.615	696.866
CS28407	6810	USA	41.2816	-86.621	723.433	C	n.d.	n.d.	n.d.
CS28419	7201	GER	51.3317	6.55934	465.793	C	120.443	120.443	217.841
CS28420	7206	GER	50.0742	8.96617	800.648	C	336.897	336.897	373.47
CS28423	7205	GER	49.631	11.5722	1212.69	C	341.815	450.986	341.815
CS28454	7224	GER	50.3833	8.0666	2809.25	T	264.652	264.652	324.256
CS28457	7227	GER	50.3833	8.0666	837.365	C	264.652	264.652	324.256
CS28459	7229	GER	50.3833	8.0666	1016.14	C	264.652	264.652	324.256
CS28461	7231	GER	50.3833	8.0666	955.982	C	264.652	264.652	324.256
CS28490	7252	UK	54.6167	-2.3	1049.32	C	51.6717	51.6717	587.114
CS28492	7255	POL	50.95	7.5	622.826	C	197.786	197.786	256.543
CS28495	7244	GER	50.001	8.26664	874.301	C	302.061	302.061	368.708
CS28510	7446	RUS	61.36	34.15	358.117	C	93.5331	93.5331	1537.65
CS28513	7449	RUS	61.36	34.15	971.058	C	93.5331	93.5331	1537.65
CS28527	7430	FRA	48.6167	6.25	620.045	C	335.098	335.098	424.81
CS28550	6847	UK	51.4083	-0.6383	1328.92	C	67.2217	67.2217	213.065
CS28564	7275	GER	51.0581	13.2995	814.242	C	298.735	302.545	298.735
CS28568	7270	NED	52.24	4.45	921.745	C	11.0261	11.0261	207.77
CS28573	7258	GER	50.5	8.5	622.139	C	283.58	283.58	318.442
CS28575	7260	GER	50.5	8.5	551.942	C	283.58	283.58	318.442
CS28578	7263	NZL	-37.7871	175.283	808.244	C	n.d.	n.d.	n.d.
CS28580	7277	GER	50.2	8.5833	796.721	C	306.457	306.457	352.213
CS28583	7280	GER	53.1667	8.2	704.811	C	25.9611	30.8204	25.9611
CS28587	7282	GER	50.3827	8.01161	539.069	C	261.513	261.513	323.656
CS28595	7291	ITA	38.07	13.22	768.194	C	17.3022	17.3022	96.5172
CS28610	7479	UK	51.2878	0.0565	756.368	C	50.7048	50.7048	192.138
CS28613	7482	UK	51.2878	0.0565	1243.6	C	50.7048	50.7048	192.138
CS28614	7483	UK	51.2878	0.0565	2256.68	T	50.7048	50.7048	192.138
CS28620	7490	UK	51.2878	0.0565	4293.7	T	50.7048	50.7048	192.138
CS28622	7492	UK	51.4167	-1.7167	697.14	C	57.7532	57.7532	245.069
CS28628	7498	UK	50.35	-3.5833	846.763	C	8.58869	8.58869	222.204
CS28631	7502	UK	51.4666	-3.2	939.691	C	9.82153	9.82153	317.768
CS28633	7504	NED	52.25	4.5667	631.706	C	4.76856	4.76856	200.846
CS28635	7506	FRA	48.6103	2.3086	670.659	C	153.74	153.74	156.238
CS28636	7507	FRA	48.6103	2.3086	415.252	C	153.74	153.74	156.238
CS28637	7508	FRA	48.6103	2.3086	818.237	C	153.74	153.74	156.238
CS28640	7300	ESP	41.5	2.25	639.41	C	18.2003	18.2003	44.4886
CS28645	7307	FRA	48.0653	-2.96591	1029.57	C	45.6772	45.6772	75.1725
CS28650	7306	CAN	49.2655	-123.206	1149.11	C	n.d.	n.d.	n.d.
CS28651	7310	GER	50.1448	8.60706	1010.36	C	311.381	311.381	358.587
CS28663	6953	CZE	49.42	16.36	709.131	C	25.8437	455.116	25.8437
CS28685	7316	NED	51.9667	5.56667	627.173	C	38.5253	38.5253	179.686
CS28692	7320	FRA	49.4424	1.09849	2017.23	C	32.8989	32.8989	38.8049
CS28713	7514	USA	41.5609	-86.4251	600.201	C	n.d.	n.d.	n.d.
CS28720	7472	Unknown	Unknown	Unknown	590.697	C	n.d.	n.d.	n.d.
CS28724	7330	JPN	43.0553	141.346	481.139	C	15.3009	14.6734	8030.29
CS28725	7340	CZE	49.1833	15.8833	791.574	C	28.1038	416.373	28.1038
CS28729	7333	ITA	46.5438	11.5614	1068.24	C	121.752	133.226	121.752
CS28734	7331	GER	51.6832	10.2144	643.295	C	211.365	211.365	232.821
CS28739	7337	GER	50.8738	8.02341	625.815	C	233.299	233.299	270.052
CS28743	7343	GER	52.5339	13.181	689.152	C	149.861	149.861	299.519
CS28750	7346	GER	52.6058	11.8558	1267.69	C	155.34	155.34	221.657
CS28759	7354	SWE	56.5	14.9	910.457	C	32.5622	32.5622	429.889
CS28760	7355	ITA	41.96	12.8	1104.67	C	43.8118	43.8118	220.022
CS28779	7372	AUT	47.0748	9.9042	918.052	C	246.091	259.113	246.091
CS28780	7373	JPN	34.43	136.31	2537.43	T	23.6089	35.2926	8484.5
CS28786	7351	UK	56.4278	-5.23439	801.238	C	4.50794	4.50794	824.57
CS28787	7378	GER	48.0333	7.7667	951.992	C	409.566	409.566	436.72
CS28788	7379	GER	48.0333	7.7667	668.588	C	409.566	409.566	436.72
CS28795	7382	NED	52.0918	5.1145	650.209	C	26.1576	26.1576	186.227
CS28800	7384	NED	52.0333	5.55	736.649	C	31.1289	31.1289	173.919
CS28804	7394	POL	52.3	21	871.759	C	260.444	260.444	400.336
CS28808	7390	NED	51.9666	5.6666	1179.21	C	41.1012	41.1012	176.341
CS28809	7391	NED	51.9666	5.6666	469.375	C	41.1012	41.1012	176.341
CS28810	7392	NED	51.9666	5.6666	911.721	C	41.1012	41.1012	176.341
CS28812	7477	USA	41.7302	-71.2825	995.497	C	n.d.	n.d.	n.d.
CS28814	7405	GER	52.6	10.0667	907.469	C	125.315	125.315	146.458
CS28822	7411	GER	47.9299	10.8134	987.445	C	284.742	296.05	284.742
CS28823	7397	RUS	52.3	30	788.288	C	n.d.	n.d.	n.d.
CS28833	7408	GER	52.3	9.3	907.309	C	122.01	122.01	141.349
CS28847	7418	SUI	47.3667	8.55	907.48	C	328.207	328.207	344.717
CS28849	7284	ROU	44.7203	22.3955	1110.4	C	95.4317	392.255	95.4317
Ct.1	6910	ITA	37.3	15	951.378	C	10.8999	10.8999	63.855
CUR.3	81	FRA	45	1.75	2012.9	C	183.244	183.244	199.962
Cvi.0	6911	CPV	15.1111	-23.6167	510.051	C	9.08908	9.08908	2852
Dra3.1	8283	SWE	55.76	14.12	1190.72	T	6.35999	6.35999	354.41
DraII.1	8284	CZE	49.4112	16.2815	443.911	C	25.3448	451.677	25.3448
DraIV.1.14	5896	CZE	49.4112	16.2815	629.39	C	25.3448	451.677	25.3448
DraIV.1.5	5887	CZE	49.4112	16.2815	1033.97	C	25.3448	451.677	25.3448
DraIV.1.7	5889	CZE	49.4112	16.2815	718.539	Not Genotyped	n.d.	n.d.	n.d.
DraIV.6.16	5987	CZE	49.4112	16.2815	1018.13	C	25.3448	451.677	25.3448
DraIV.6.35	6005	CZE	49.4112	16.2815	923.503	C	25.3448	451.677	25.3448
Duk	6008	CZE	49.1	16.2	4868.11	T	4.76983	418.148	4.76983
Eden.2	6913	SWE	62.877	18.177	606.459	C	2.83039	2.83039	1037.7
Edi.0	6914	UK	55.9494	-3.16028	542.161	C	4.26071	4.26071	685.924
Est.1	6916	RUS	58.3	25.3	1291.57	C	48.0919	48.0919	1084.24
Fab.2	6917	SWE	63.01	18.19	453.459	C	n.d.	n.d.	n.d.
Fei.0	8215	POR	40.5	-8.32	2523.58	C	19.0419	28.1051	19.0419
Fja1.1	8422	SWE	56.06	14.29	739.422	C	2.52953	2.52953	377.333
Fja1.2	6019	SWE	56.06	14.29	652.664	C	2.52953	2.52953	377.333
Fja1.5	6020	SWE	56.06	14.29	1091.07	C	2.52953	2.52953	377.333
Ga.0	6919	GER	50.3	8	2017.1	C	266.338	266.338	332.608
Gd.1	8296	GER	53.5	10.5	841.858	C	48.7895	48.7895	90.337
Ge.0	8297	SUI	46.5	6.08	757.979	C	306.09	306.09	319.014
Got.7	6921	GER	51.5338	9.9355	942.756	C	217.539	217.539	237.112
Gr.1	8300	AUT	47	15.5	790.845	C	115.598	196.793	115.598
Gul1.2	8234	SWE	56.3	16	823.363	Not Genotyped	n.d.	n.d.	n.d.
Gy.0	8214	FRA	49	2	868.141	C	111.324	111.324	114.844
Hi.0	7167	NED	52	5	610.941	Not Genotyped	n.d.	n.d.	n.d.
Hod	8235	CZE	48.8	17.1	764.442	C	12.4256	426.174	12.4256
Hov4.1	8306	SWE	56.1	13.74	566.214	C	32.8612	32.8612	347.028
Hovdala.2	6039	SWE	56.1	13.74	594.182	C	32.8612	32.8612	347.028
HR.5	6924	UK	51.4083	-0.6383	1785.34	C	67.2217	67.2217	213.065
Hs.0	8310	GER	52.24	9.44	511.68	C	131.873	131.873	151.942
HSm	8236	CZE	49.33	15.76	565.189	C	41.7355	427.872	41.7355
In.0	8311	AUT	47.5	11.5	1333.97	C	221.264	232.252	221.264
JEA	91	FRA	43.6833	7.33333	1751.01	T	5.73378	5.73378	167.737
Ka.0	8314	AUT	47	14	1355.27	C	141.27	141.27	151.845
Kas.2	8424	IND	35	77	580.169	C	n.d.	n.d.	n.d.
KBS.Mac.8	1716	USA	42.405	-85.398	2216.82	C	n.d.	n.d.	n.d.
Kelsterbach.4	8420	GER	50.0667	8.5333	625.479	C	312.312	312.312	365.686
Kin.0	6926	USA	44.46	-85.37	755.71	C	n.d.	n.d.	n.d.
Kno.18	6928	USA	41.2816	-86.621	903.385	C	n.d.	n.d.	n.d.
Koln	8239	GER	51	7	854.449	C	164.24	164.24	250.624
Kulturen.1	8240	SWE	55.705	13.196	685.835	C	19.7781	19.7781	298.712
LAC.3	94	FRA	47.7	6.81667	877.745	C	395.405	395.405	463.771
LAC.5	96	FRA	47.7	6.81667	892.153	C	395.405	395.405	463.771
Lc.0	8323	UK	57	-4	793.054	C	56.1631	56.1631	777.156
LDV.25	116	FRA	48.5167	-4.06667	1529.99	C	14.6854	14.6854	154.958
LDV.34	126	FRA	48.5167	-4.06667	2359.54	C	14.6854	14.6854	154.958
LDV.58	149	FRA	48.5167	-4.06667	1756.27	C	14.6854	14.6854	154.958
Ler.1	6932	GER	47.984	10.8719	906.09	C	288.414	299.672	288.414
LI.OF.095	641	USA	40.7777	-72.9069	1820.07	C	n.d.	n.d.	n.d.
Liarum	8241	SWE	55.9473	13.821	652.904	C	23.562	23.562	345.584
Lillo.1	8242	SWE	56.1494	15.7884	507.751	C	2.76045	2.76045	467
Lip.0	8325	POL	50	19.3	950.608	C	190.687	481.507	190.687
Lis.1	8326	SWE	56.0328	14.775	842.334	C	17.6884	17.6884	403.677
Lis.2	8222	SWE	56.0328	14.775	1892.7	C	17.6884	17.6884	403.677
Lisse	8430	NED	52.25	4.5667	619.176	C	4.76856	4.76856	200.846
LL.0	6933	ESP	41.59	2.49	1019.18	C	13.687	13.687	38.0084
Lm.2	8329	FRA	48	0.5	517.957	C	149.986	149.986	150.672
Lom1.1	6042	SWE	56.09	13.9	656.755	C	23.8629	23.8629	355.993
Lov.5	6046	SWE	62.801	18.079	513.044	C	5.32185	5.32185	1027.94
Lp2.2	7520	CZE	49.38	16.81	1059.9	C	12.1493	467.143	12.1493
Lp2.6	7521	CZE	49.38	16.81	1101.23	C	12.1493	467.143	12.1493
Lund	8335	SWE	55.71	13.2	784.702	C	20.1793	20.1793	299.174
Lz.0	6936	FRA	46	3.3	529.89	C	255.183	281.981	255.183
Map.42	2057	USA	42.166	-86.412	1461.02	C	n.d.	n.d.	n.d.
MIB.15	166	FRA	47.3833	5.31667	1069.39	C	397.241	409.666	397.241
MIB.22	173	FRA	47.3833	5.31667	838.945	C	397.241	409.666	397.241
MIB.28	178	FRA	47.3833	5.31667	1271.26	C	397.241	409.666	397.241
MIB.84	223	FRA	47.3833	5.31667	766.594	C	397.241	409.666	397.241
MNF.Che.2	1925	USA	43.5251	-86.1843	1529.01	C	n.d.	n.d.	n.d.
MNF.Jac.32	1967	USA	43.5187	-86.1739	1544.22	C	n.d.	n.d.	n.d.
MNF.Pot.48	1859	USA	43.595	-86.2657	2107.95	C	n.d.	n.d.	n.d.
MNF.Pot.68	1867	USA	43.595	-86.2657	2897.31	C	n.d.	n.d.	n.d.
MOG.37	242	FRA	48.6667	-4.06667	1293.82	T	2.83563	2.83563	154.145
Mr.0	7522	ITA	44.15	9.65	688.297	C	2.21162	2.21162	167.729
Mrk.0	6937	GER	49	9.3	484.508	C	432.899	432.899	443.252
Mt.0	6939	LIB	32.34	22.46	406.3	C	39.0557	39.0557	632.407
Mz.0	6940	GER	50.3	8.3	733.349	C	283.549	283.549	336.6
N13	7438	RUS	61.36	34.15	1124.91	C	93.5331	93.5331	1537.65
Na.1	8343	FRA	47.5	1.5	684.193	C	206.189	224.505	206.189
NC.6	8246	USA	35	-79.18	1291.6	Not Genotyped	n.d.	n.d.	n.d.
Nd.1	6942	SUI	50	10	642.368	C	381.287	381.287	397.251
NFA.10	6943	UK	51.4083	-0.6383	1478.62	C	67.2217	67.2217	213.065
NFA.8	6944	UK	51.4083	-0.6383	1573.58	C	67.2217	67.2217	213.065
Omo2.1	8349	SWE	56.1509	15.7735	829.336	C	n.d.	n.d.	n.d.
Or.1	6074	SWE	56.45	16.11	799.566	C	10.0619	10.0619	497.799
Ost.0	8351	SWE	60.25	18.37	965.494	C	2.90744	2.90744	828.949
Oy.0	6946	NOR	60.23	6.13	563.977	C	2.67814	2.67814	596.823
Pa.1	8353	ITA	38.07	13.22	1758.3	C	17.3022	17.3022	96.5172
PAR.3	258	FRA	46.65	-0.25	642.669	C	44.2431	68.6518	44.2431
PAR.4	259	FRA	46.65	-0.25	1407.94	C	44.2431	68.6518	44.2431
PAR.5	260	FRA	46.65	-0.25	829.813	C	44.2431	68.6518	44.2431
Paw.3	2150	USA	42.148	-86.431	839.972	C	n.d.	n.d.	n.d.
Pent.1	2187	USA	43.7623	-86.3929	534.04	C	n.d.	n.d.	n.d.
Per.1	8354	RUS	58	56.3167	603.302	C	n.d.	n.d.	n.d.
Petergof	7296	RUS	59	29	770.447	C	74.6781	74.6781	1211.99
PHW.34	8244	FRA	48.6103	2.3086	337.159	Not Genotyped	n.d.	n.d.	n.d.
Pna.17	7523	USA	42.0945	-86.3253	492.821	C	n.d.	n.d.	n.d.
Pro.0	8213	ESP	43.25	-6	1278.59	C	34.8488	34.8488	114.294
Pu2.23	6951	CZE	49.42	16.36	883.163	C	25.8437	455.116	25.8437
Ra.0	6958	FRA	46	3.3	555.802	C	255.183	281.981	255.183
Rak.2	8365	CZE	49	16	577.209	C	13.6957	401.578	13.6957
Ren.1	6959	FRA	48.5	-1.41	1057.55	T	5.04691	13.0133	5.04691
Rev.2	6076	SWE	55.6942	13.4504	1242.5	C	26.8182	26.8182	312.784
Rmx.A180	7525	USA	42.036	-86.511	576.457	C	n.d.	n.d.	n.d.
ROM.1	267	FRA	45.5333	4.85	722.373	C	188.22	229.271	188.22
RRS.10	7515	USA	41.5609	-86.4251	2101.73	C	n.d.	n.d.	n.d.
Rsch.4	8374	RUS	56.3	34	751.098	C	433.381	433.381	1025.71
Sanna.2	8376	SWE	62.69	18	569.715	C	12.2636	12.2636	1015.65
Sap.0	8378	CZE	49.49	14.24	748.281	C	152.018	417.76	152.018
Sav.0	8412	CZE	49.1833	15.8833	745.331	C	28.1038	416.373	28.1038
Se.0	6961	ESP	38.3333	-3.53333	809.348	C	37.3948	172.968	37.3948
Shahdara	6962	TJK	38.35	68.48	787.658	C	n.d.	n.d.	n.d.
SLSP.30	2274	USA	43.665	-86.496	682.222	C	n.d.	n.d.	n.d.
Sparta.1	6085	SWE	55.7097	13.2145	938.78	C	21.039	21.039	299.984
Sq.8	6967	UK	51.4083	-0.6383	974.602	C	67.2217	67.2217	213.065
St.0	8387	SWE	59	18	1194.36	C	8.71849	8.71849	726.462
Ste.3	2290	USA	42.03	-86.514	942.388	C	n.d.	n.d.	n.d.
T1040	6094	SWE	55.6494	13.2147	743.057	C	20.1835	20.1835	297.227
T1060	6096	SWE	55.6472	13.2225	699.43	C	20.6828	20.6828	297.577
T1080	6098	SWE	55.6561	13.2178	871.779	C	20.3664	20.3664	297.707
T1110	6100	SWE	55.6	13.2	930.305	C	20.2182	20.2182	294.202
T510	6109	SWE	55.7936	13.1233	925.66	C	18.9664	18.9664	298.947
T540	6112	SWE	55.7967	13.1044	658.516	C	17.8973	17.8973	298.053
T620	6119	SWE	55.7	13.2	970.541	C	19.8735	19.8735	298.705
T690	6124	SWE	55.8378	13.3092	1251.85	C	31.4665	31.4665	311.542
Ta.0	8389	CZE	49.5	14.5	868.208	C	134.18	421.695	134.18
TAD.01	6169	SWE	62.8714	18.3447	1126.51	C	7.87353	7.87353	1042.35
Tamm.2	6968	FIN	60	23.5	497.812	C	4.43194	4.43194	1050.87
TDr.1	6188	SWE	55.7683	14.1386	593.433	C	5.57821	5.57821	355.83
TDr.17	6202	SWE	55.7717	14.1206	932.998	C	5.05852	5.05852	354.918
TDr.18	6203	SWE	55.7714	14.1208	1027.64	C	5.09224	5.09224	354.917
TDr.3	6190	SWE	55.7686	14.1381	1351.65	C	5.53868	5.53868	355.813
TDr.8	6194	SWE	55.7706	14.1342	1254.07	T	5.27103	5.27103	355.666
Tomegap.2	6242	SWE	55.7	13.2	708.367	C	19.8735	19.8735	298.705
Tottarp.2	6243	SWE	55.95	13.85	589.96	C	22.1781	22.1781	347.343
TOU.A1.115	281	FRA	46.6667	4.11667	1071.57	C	313.364	349.285	313.364
TOU.A1.116	282	FRA	46.6667	4.11667	836.292	C	313.364	349.285	313.364
TOU.A1.12	286	FRA	46.6667	4.11667	1213.49	Not Genotyped	n.d.	n.d.	n.d.
TOU.A1.43	321	FRA	46.6667	4.11667	1120.8	C	313.364	349.285	313.364
TOU.A1.62	328	FRA	46.6667	4.11667	701.086	C	313.364	349.285	313.364
TOU.A1.67	333	FRA	46.6667	4.11667	1128.9	Not Genotyped	n.d.	n.d.	n.d.
TOU.A1.96	357	FRA	46.6667	4.11667	906.437	C	313.364	349.285	313.364
TOU.C.3	362	FRA	46.6667	4.11667	717.429	C	313.364	349.285	313.364
TOU.E.11	366	FRA	46.6667	4.11667	860.115	C	313.364	349.285	313.364
TOU.H.12	373	FRA	46.6667	4.11667	2182.19	C	313.364	349.285	313.364
TOU.H.13	374	FRA	46.6667	4.11667	1266.6	C	313.364	349.285	313.364
TOU.I.17	378	FRA	46.6667	4.11667	593.441	C	313.364	349.285	313.364
TOU.I.2	379	FRA	46.6667	4.11667	868.114	C	313.364	349.285	313.364
TOU.I.6	380	FRA	46.6667	4.11667	1647.71	C	313.364	349.285	313.364
TOU.J.3	383	FRA	46.6667	4.11667	866.06	C	313.364	349.285	313.364
TOU.K.3	386	FRA	46.6667	4.11667	1900.34	C	313.364	349.285	313.364
Ts.1	6970	ESP	41.7194	2.93056	2504.59	T	13.4665	13.4665	17.7699
UduI.1.34	6318	CZE	49.2771	16.6314	786.446	C	5.45442	450.661	5.45442
UKID101	5805	UK	53.2	-1.4	1233.09	C	94.4761	94.4761	419.108
UKID22	5729	UK	54.7	-3.4	1324.21	T	5.01996	5.01996	621.135
UKID37	5742	UK	51.3	1.1	3997.4	C	5.7838	5.7838	202.255
UKID48	5753	UK	54.7	-2.7	1182.39	T	31.5217	31.5217	604.184
UKID80	5785	UK	54.7	-2.9	985.418	C	23.7669	23.7669	608.694
UKNW06.059	5380	UK	54.4	-3	1480.42	C	26.1867	26.1867	580.177
UKNW06.060	5381	UK	54.4	-3	1255.33	C	26.1867	26.1867	580.177
UKNW06.386	5565	UK	54.6	-3.1	4358.41	T	21.6993	21.6993	603.2
UKNW06.436	5606	UK	54.7	-3.4	929.227	C	5.01996	5.01996	621.135
UKNW06.460	5628	UK	54.7	-3.4	1107.22	C	5.01996	5.01996	621.135
UKSE06.062	4997	UK	51.3	0.5	1255.33	C	21.1574	21.1574	194.72
UKSE06.192	5056	UK	51.3	0.5	1025.02	C	21.1574	21.1574	194.72
UKSE06.272	5116	UK	51.3	0.4	1575.51	C	28.0496	28.0496	194.012
UKSE06.278	5122	UK	51.3	0.4	1194.4	C	28.0496	28.0496	194.012
UKSE06.349	5158	UK	51.3	0.4	1295.1	C	28.0496	28.0496	194.012
UKSE06.351	5160	UK	51.3	0.4	1487.89	C	28.0496	28.0496	194.012
UKSE06.414	5202	UK	51.3	0.4	1462.88	C	28.0496	28.0496	194.012
UKSE06.429	5207	UK	51.3	0.4	1535.25	C	28.0496	28.0496	194.012
UKSE06.466	5232	UK	51.2	0.4	778.757	C	31.4116	31.4116	182.921
UKSE06.482	5245	UK	51.2	0.6	1329.55	C	20.0985	20.0985	184.695
UKSE06.520	5264	UK	51.3	1.1	805.162	C	5.7838	5.7838	202.255
UKSE06.628	5341	UK	51.1	0.4	895.924	C	33.7311	33.7311	171.836
UKSW06.202	4802	UK	50.4	-4.9	1478.45	C	8.49091	8.49091	287.92
Ull2.3	6973	SWE	56.0648	13.9707	932.01	C	18.6725	18.6725	359.225
Ull2.5	6974	SWE	56.0648	13.9707	762.179	C	18.6725	18.6725	359.225
Ull3.4	6413	SWE	56.06	13.97	693.182	C	18.3797	18.3797	359.013
Uod.7	6976	AUT	48.3	14.45	799.071	C	142.592	289.76	142.592
Var2.1	7516	SWE	55.58	14.334	606.655	C	10.3724	10.3724	360.491
VOU.1	390	FRA	46.65	0.166667	1140.7	T	68.9522	96.6251	68.9522
VOU.2	392	FRA	46.65	0.166667	3513.96	C	68.9522	96.6251	68.9522
Wil.1	8419	LTU	54.6833	25.3167	659.091	Not Genotyped	n.d.	n.d.	n.d.
Ws.0	6980	RUS	52.3	30	1418.3	C	n.d.	n.d.	n.d.
Wt.5	6982	GER	52.3	9.3	575.782	C	122.01	122.01	141.349
X11ME1.32	8610	USA	42.093	-86.359	1057.37	C	n.d.	n.d.	n.d.
X11PNA4.101	8796	USA	42.0945	-86.3253	723.012	C	n.d.	n.d.	n.d.
X328PNA054	8692	USA	42.0945	-86.3253	1333.21	C	n.d.	n.d.	n.d.
X627ME.4Y1	7571	USA	42.093	-86.359	925.542	Not Genotyped	n.d.	n.d.	n.d.
Yo.0	6983	USA	37.45	-119.35	527.35	C	n.d.	n.d.	n.d.
Zdr.6	6985	CZE	49.3853	16.2544	1160.66	C	22.8609	448.222	22.8609
ZdrI.2.24	6448	CZE	49.3853	16.2544	759.391	C	22.8609	448.222	22.8609
ZdrI.2.25	6449	CZE	49.3853	16.2544	719.818	C	22.8609	448.222	22.8609
