# Supplementary material for: A Coastal Cline in Sodium Accumulation in Arabidopsis thaliana Is Driven by Natural Variation of the Sodium Transporter AtHKT1;1
Source: PubMed Central journal article supplement (PMC2978683; doi:10.1371/journal.pgen.1001193), 2010-11-11

**Core360set**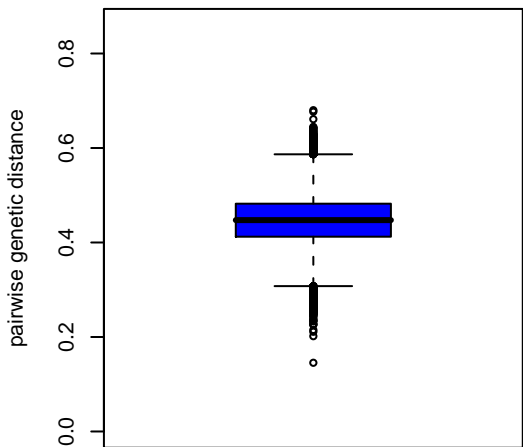**Random360set1**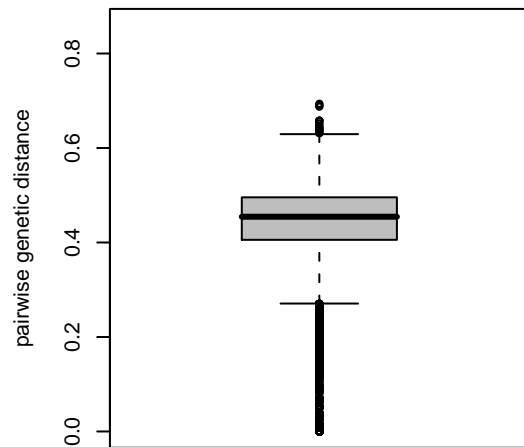**Random360set2**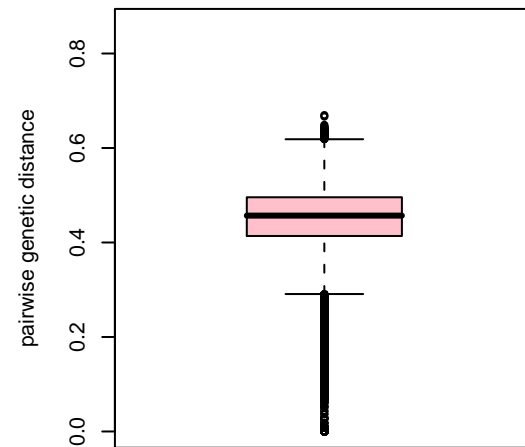**Random360set3**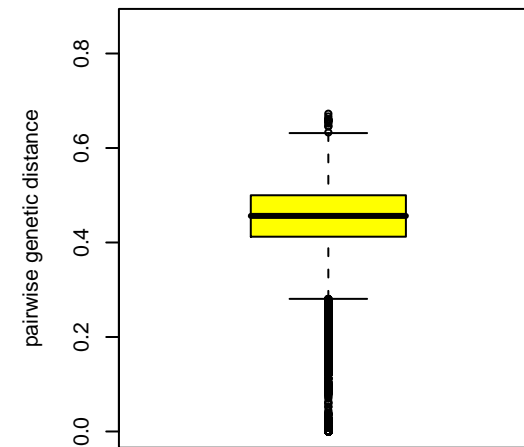**Core360set**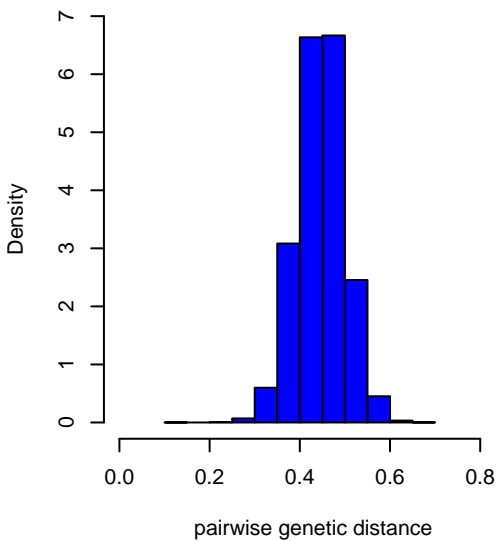**Random360set1**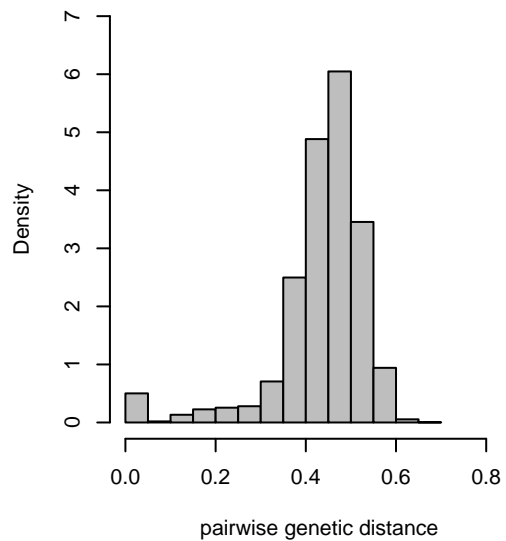**Random360set2**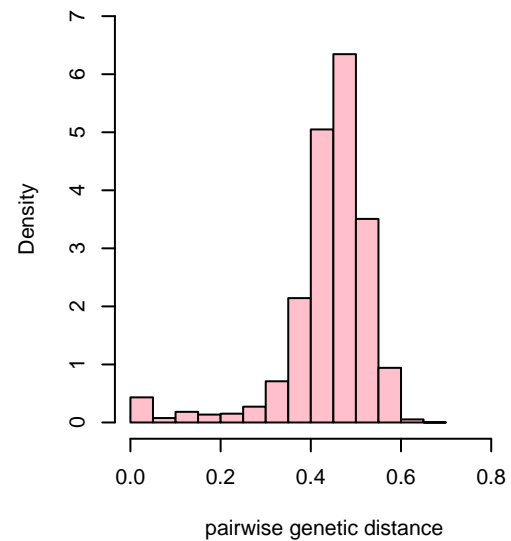**Random360set3**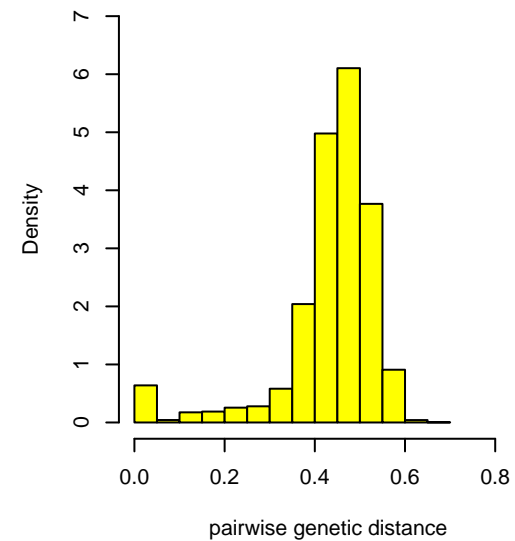

Supplement: pgen.1001193.s002.pdf [file pgen.1001193.s002.pdf]
